# Supplementary material for: Phloem anatomy predicts berry sugar accumulation across 13 wine-grape cultivars
Source: Frontiers journal article supplement (doi:10.3389/fpls.2024.1360381), 2024-03-21
Supplement: Data_Sheet_1.zip [file Data_Sheet_1.zip]

## Sheet: label_cor_P
	Tavg_mean	Tmax_max	Prec_gs	Prec_ann	VP_mean	VP_max	VPD_mean	VPD_max	RH_mean	RH_min	maxbrix	slopell.4	slopelogSEll.4	HalfHeightll.4	HHSEll.4	Smaxll.4	SmaxSEll.4	transition width11.4	gdd_logistic LL4	HalfHeightMM3	HalfheightMM3se	SmaxMM3	SmaxMM3se	Transition width MM3	gdd_MM3.2	gdd_MM3	gdd_slope	slope_std	midvein_phloem	petiole_phloem	pedicel_phloem	porosity	SE_area	delta_brix	max_photo	midvein_xylem	petiole_xylem	pedicel_xylem	A_gdd_max_ave	WP_Max_Brix	WP_gdd_max	A_July23	A_July30	A_Aug5	A_Sep3	psi_min_pd	psiPD_July23	psiPD_Aug5	psiPD_Sept3
Tavg_mean	NA	8.5398355054167e-13	0.000340486	7.15880216257681e-05	5.27999866051232e-12	2.0241142095756e-11	3.89555459001656e-08	1.45685993491185e-07	4.3935246551996e-09	6.06951875425921e-08	0.846802	0.91621	0.610376	0.967323	0.962004	0.917359	0.773715	0.994164	0.323026	0.537546	0.636029	0.673921	0.676005	0.473632	0.392724	0.427109	0.690003	0.772467	0.997071	0.786193	0.236769	0.230839	0.0680002	0.45203	0.90976	0.856605	0.729621	0.846328	0.15369	0.340652	0.992576	0.196339	0.19208	0.103364	0.0853804	0.547624	0.608617	0.769773	0.401551
Tmax_max	8.5398355054167e-13	NA	7.31985955702008e-05	0.000193939	2.11146096162906e-08	6.04986616359326e-09	1.52826462596067e-09	9.11341142550981e-08	1.97097760334941e-09	1.49572962460098e-07	0.948094	0.867557	0.720953	0.981746	0.99345	0.873838	0.849133	0.999831	0.518764	0.700924	0.773522	0.842473	0.815278	0.619611	0.357219	0.370409	0.66885	0.940444	0.865391	0.654807	0.475494	0.186545	0.0758502	0.40829	0.898373	0.752456	0.610475	0.638652	0.217199	0.345193	0.942069	0.160178	0.190633	0.101829	0.0756367	0.535237	0.584391	0.738673	0.433266
Prec_gs	0.000340486	7.31985955702008e-05	NA	1.74833103376848e-05	0.0002461	7.7780218792789e-05	0.00506821	0.0133584	1.34075412838719e-06	3.92181287778293e-06	0.706569	0.145134	0.0693538	0.799797	0.765377	0.783462	0.593346	0.792598	0.965106	0.744508	0.802711	0.757354	0.748485	0.618504	0.230664	0.231656	0.997741	0.660269	0.302547	0.757427	0.990452	0.356065	0.472887	0.691017	0.900491	0.363961	0.728747	0.437821	0.137486	0.525505	0.911047	0.285194	0.508278	0.496638	0.064656	0.527953	0.750791	0.512238	0.0721087
Prec_ann	7.15880216257681e-05	0.000193939	1.74833103376848e-05	NA	1.63834854438605e-05	3.28657576627034e-05	0.00566766	0.00713004	1.12146121789003e-06	1.96611030989224e-06	0.275294	0.190934	0.148263	0.570929	0.554692	0.500432	0.154942	0.530719	0.286762	0.0964361	0.114297	0.164904	0.117626	0.0772036	0.418164	0.500754	0.877744	0.169037	0.279462	0.616177	0.19017	0.512682	0.22835	0.951799	0.769908	0.378258	0.694916	0.744166	0.0386563	0.186212	0.98671	0.28328	0.423601	0.26649	0.141234	0.879226	0.952876	0.805053	0.296862
VP_mean	5.27999866051232e-12	2.11146096162906e-08	0.0002461	1.63834854438605e-05	NA	2.22044604925031e-16	2.97537077802446e-05	4.79955607315397e-05	3.11565839794525e-09	1.18129461768035e-09	0.654559	0.738746	0.305848	0.878893	0.854794	0.904144	0.762927	0.906566	0.227694	0.525617	0.6561	0.629049	0.658138	0.469087	0.41551	0.474656	0.910434	0.587441	0.798476	0.773827	0.197221	0.293513	0.0881009	0.655946	0.898554	0.925355	0.716641	0.902207	0.0856774	0.537472	0.742006	0.213403	0.226717	0.139187	0.0733173	0.532152	0.689449	0.756134	0.322601
VP_max	2.0241142095756e-11	6.04986616359326e-09	7.7780218792789e-05	3.28657576627034e-05	2.22044604925031e-16	NA	3.09960734878878e-05	8.30890015390828e-05	4.49424497617201e-10	1.41484823856786e-10	0.737146	0.607118	0.253693	0.895455	0.909231	0.86752	0.824553	0.920476	0.282281	0.692454	0.803637	0.795649	0.813768	0.613997	0.411241	0.447993	0.883114	0.752799	0.813297	0.632942	0.257024	0.243736	0.133752	0.614388	0.878787	0.924502	0.583421	0.837115	0.106015	0.60706	0.710362	0.194808	0.249172	0.157525	0.0670365	0.551444	0.729619	0.724833	0.309041
VPD_mean	3.89555459001656e-08	1.52826462596067e-09	0.00506821	0.00566766	2.97537077802446e-05	3.09960734878878e-05	NA	2.50910403565285e-14	3.31901542645063e-05	0.000345127	0.770946	0.323315	0.648376	0.934774	0.91693	0.889401	0.901901	0.913597	0.630203	0.652494	0.696208	0.833342	0.801798	0.577715	0.388527	0.387839	0.409766	0.832253	0.65757	0.79653	0.442002	0.22447	0.0908654	0.237714	0.95578	0.500277	0.752563	0.68929	0.493042	0.162234	0.57154	0.197825	0.138592	0.0593403	0.118855	0.549306	0.484383	0.802163	0.534348
VPD_max	1.45685993491185e-07	9.11341142550981e-08	0.0133584	0.00713004	4.79955607315397e-05	8.30890015390828e-05	2.50910403565285e-14	NA	0.0001642	0.00110788	0.885222	0.246271	0.567759	0.881743	0.886437	0.955506	0.79771	0.850026	0.6	0.473065	0.519039	0.671173	0.63766	0.408773	0.386216	0.393488	0.368785	0.831788	0.748993	0.970365	0.337446	0.279789	0.0942064	0.228418	0.921459	0.545086	0.914474	0.743895	0.459401	0.121609	0.554449	0.270156	0.103181	0.0506556	0.166471	0.514891	0.512658	0.767327	0.50509
RH_mean	4.3935246551996e-09	1.97097760334941e-09	1.34075412838719e-06	1.12146121789003e-06	3.11565839794525e-09	4.49424497617201e-10	3.31901542645063e-05	0.0001642	NA	2.70894418008538e-14	0.614479	0.451308	0.282644	0.865659	0.831051	0.888172	0.543901	0.850638	0.403075	0.548029	0.60715	0.64396	0.582783	0.469989	0.429893	0.461833	0.971701	0.650035	0.846052	0.899042	0.37458	0.31353	0.114066	0.636322	0.981208	0.873886	0.836557	0.818342	0.105106	0.437322	0.867366	0.2077	0.194676	0.135122	0.0815542	0.48312	0.712481	0.658944	0.314929
RH_min	6.06951875425921e-08	1.49572962460098e-07	3.92181287778293e-06	1.96611030989224e-06	1.18129461768035e-09	1.41484823856786e-10	0.000345127	0.00110788	2.70894418008538e-14	NA	0.521023	0.377975	0.219733	0.945636	0.966443	0.972933	0.641353	0.957241	0.366922	0.632722	0.716509	0.733652	0.660771	0.564917	0.461644	0.518013	0.847322	0.555775	0.848023	0.768666	0.383399	0.343932	0.173384	0.821434	0.937177	0.870059	0.707982	0.786073	0.0800147	0.69444	0.63547	0.189503	0.233723	0.173619	0.0540887	0.445727	0.751316	0.648831	0.266486
maxbrix	0.846802	0.948094	0.706569	0.275294	0.654559	0.737146	0.770946	0.885222	0.614479	0.521023	NA	0.516683	0.754427	0.632132	0.58869	0.895979	0.0880259	0.574371	0.799834	0.0416832	0.0296821	0.281147	0.0398009	0.0360303	0.742314	0.668931	0.21475	0.759492	0.912837	0.520244	0.589104	0.346739	0.906486	0.223773	0.0104716	0.754094	0.45342	0.193209	0.138156	0.705944	0.0574333	0.549777	0.0948183	0.48553	0.699584	0.193676	0.755631	0.192389	0.416409
slopell.4	0.91621	0.867557	0.145134	0.190934	0.738746	0.607118	0.323315	0.246271	0.451308	0.377975	0.516683	NA	5.68485032033106e-05	0.220587	0.141795	0.207722	0.180969	0.211046	0.654471	0.798316	0.652714	0.729536	0.634018	0.688007	0.079625	0.147754	0.796131	0.867741	0.0496267	0.766093	0.561133	0.606394	0.558999	0.836657	0.559231	0.0155616	0.78788	0.476565	0.338853	0.666326	0.781758	0.472882	0.518372	0.216937	0.558893	0.826283	0.0129057	0.302083	0.274204
slopelogSEll.4	0.610376	0.720953	0.0693538	0.148263	0.305848	0.253693	0.648376	0.567759	0.282644	0.219733	0.754427	5.68485032033106e-05	NA	0.333176	0.395827	0.207176	0.426592	0.335176	0.893211	0.621135	0.762909	0.344747	0.622413	0.575847	0.921415	0.962998	0.788613	0.424867	0.00177154	0.788881	0.897566	0.642787	0.757515	0.913487	0.715358	0.00105258	0.8331	0.818797	0.267424	0.606169	0.901933	0.691339	0.629475	0.488868	0.250893	0.30503	0.712934	0.816202	0.282441
HalfHeightll.4	0.967323	0.981746	0.799797	0.570929	0.878893	0.895455	0.934774	0.881743	0.865659	0.945636	0.632132	0.220587	0.333176	NA	5.13122877521255e-12	1.37349069895265e-08	2.19093932019021e-06	0	0.130679	0.00281545	0.00087759	0.000638137	0.000567609	0.000705324	0.163619	0.692401	0.151853	0.513028	0.373982	0.291091	0.43075	0.330963	0.58503	0.215678	0.936631	0.61618	0.358342	0.409524	0.195562	0.00107126	0.905917	0.624801	0.439912	0.287232	0.866466	0.562649	0.965017	0.798426	0.913688
HHSEll.4	0.962004	0.99345	0.765377	0.554692	0.854794	0.909231	0.91693	0.886437	0.831051	0.966443	0.58869	0.141795	0.395827	5.13122877521255e-12	NA	6.82163185539153e-06	7.45510733635157e-06	4.36983782492462e-13	0.306191	0.00933569	0.00172393	0.00631263	0.00264675	0.00272161	0.962112	0.783625	0.157165	0.25049	0.394596	0.295461	0.345177	0.47893	0.854351	0.212145	0.67695	0.602494	0.365977	0.294573	0.363694	0.00231645	0.9466	0.852504	0.465528	0.424969	0.840922	0.592683	0.83811	0.610778	0.924671
Smaxll.4	0.917359	0.873838	0.783462	0.500432	0.904144	0.86752	0.889401	0.955506	0.888172	0.972933	0.895979	0.207722	0.207176	1.37349069895265e-08	6.82163185539153e-06	NA	4.10667362849004e-06	4.74917523085594e-08	0.525616	0.00135576	0.00127714	2.11805341878701e-05	0.000176565	0.000476616	0.936073	0.814836	0.152473	0.739351	0.256232	0.216275	0.500799	0.312968	0.52577	0.219865	0.0686514	0.401514	0.26573	0.29286	0.0578329	0.0037724	0.769263	0.780697	0.00306523	0.102728	0.896685	0.201834	0.602912	0.501201	0.739437
SmaxSEll.4	0.773715	0.849133	0.593346	0.154942	0.762927	0.824553	0.901901	0.79771	0.543901	0.641353	0.0880259	0.180969	0.426592	2.19093932019021e-06	7.45510733635157e-06	4.10667362849004e-06	NA	1.08625918837646e-06	0.446997	1.79568623659421e-06	5.86214252695783e-08	8.68231833406341e-06	2.04404848602735e-08	1.51236916323683e-07	0.75218	0.992452	0.157485	0.893606	0.294238	0.263036	0.321927	0.366665	0.881622	0.216221	0.672646	0.458522	0.339137	0.246827	0.0331653	0.0140548	0.483999	0.963698	0.788053	0.815432	0.628641	0.450712	0.499496	0.513292	0.880551
transition width11.4	0.994164	0.999831	0.792598	0.530719	0.906566	0.920476	0.913597	0.850026	0.850638	0.957241	0.574371	0.211046	0.335176	0	4.36983782492462e-13	4.74917523085594e-08	1.08625918837646e-06	NA	0.128195	0.00197874	0.000492447	0.000586551	0.000416719	0.000455811	0.172462	0.690773	0.139549	0.467884	0.328817	0.284739	0.393154	0.375284	0.627339	0.202343	0.857267	0.561292	0.352517	0.367892	0.200879	0.00109064	0.929238	0.679946	0.439642	0.316358	0.959053	0.564925	0.991651	0.738752	0.940412
gdd_logistic LL4	0.323026	0.518764	0.965106	0.286762	0.227694	0.282281	0.630203	0.6	0.403075	0.366922	0.799834	0.654471	0.893211	0.130679	0.306191	0.525616	0.446997	0.128195	NA	0.36973	0.454412	0.586781	0.609222	0.223117	0.615856	0.619897	0.349615	0.704807	0.271931	0.0458701	0.00674298	0.62113	0.0434125	0.4506	0.758268	0.627887	0.0536719	0.141044	0.568959	0.470392	0.432476	0.462961	0.389264	0.231155	0.106202	0.459671	0.589654	0.826867	0.40909
HalfHeightMM3	0.537546	0.700924	0.744508	0.0964361	0.525617	0.692454	0.652494	0.473065	0.548029	0.632722	0.0416832	0.798316	0.621135	0.00281545	0.00933569	0.00135576	1.79568623659421e-06	0.00197874	0.36973	NA	3.26361160318811e-12	8.36337532561515e-09	8.16680056914265e-13	5.32907051820075e-15	0.00434192	0.0298771	0.179261	0.471165	0.181821	0.276668	0.288933	0.360262	0.484834	0.27002	0.960426	0.369523	0.331805	0.45478	0.0227561	0.02927	0.597233	0.569269	0.25851	0.0731759	0.809581	0.628933	0.428751	0.821184	0.736396
HalfheightMM3se	0.636029	0.773522	0.802711	0.114297	0.6561	0.803637	0.696208	0.519039	0.60715	0.716509	0.0296821	0.652714	0.762909	0.00087759	0.00172393	0.00127714	5.86214252695783e-08	0.000492447	0.454412	3.26361160318811e-12	NA	1.30859021751917e-06	4.51749748719976e-12	1.2196910148532e-12	0.10646	0.133497	0.201088	0.800959	0.20461	0.286591	0.300457	0.4568	0.728318	0.298501	0.796787	0.412246	0.357093	0.362413	0.0490558	0.0211571	0.64762	0.745839	0.321762	0.197373	0.936498	0.595371	0.756115	0.879708	0.841338
SmaxMM3	0.673921	0.842473	0.757354	0.164904	0.629049	0.795649	0.833342	0.671173	0.64396	0.733652	0.281147	0.729536	0.344747	0.000638137	0.00631263	2.11805341878701e-05	8.68231833406341e-06	0.000586551	0.586781	8.36337532561515e-09	1.30859021751917e-06	NA	8.09514810740097e-09	2.02921066616568e-08	0.0926085	0.064809	0.180162	0.225821	0.135112	0.213865	0.333507	0.244957	0.31157	0.258853	0.0730117	0.277564	0.250669	0.337175	0.015043	0.0215553	0.664624	0.412401	0.703653	0.56919	0.782674	0.0892829	0.262539	0.129055	0.161814
SmaxMM3se	0.676005	0.815278	0.748485	0.117626	0.658138	0.813768	0.801798	0.63766	0.582783	0.660771	0.0398009	0.634018	0.622413	0.000567609	0.00264675	0.000176565	2.04404848602735e-08	0.000416719	0.609222	8.16680056914265e-13	4.51749748719976e-12	8.09514810740097e-09	NA	5.79536418854332e-13	0.0670011	0.0480671	0.284585	0.478183	0.247116	0.315903	0.42408	0.302438	0.611695	0.385156	0.972648	0.471735	0.388704	0.457479	0.017678	0.0224879	0.460784	0.745091	0.424036	0.212584	0.870895	0.418658	0.643531	0.908002	0.629997
Transition width MM3	0.473632	0.619611	0.618504	0.0772036	0.469087	0.613997	0.577715	0.408773	0.469989	0.564917	0.0360303	0.688007	0.575847	0.000705324	0.00272161	0.000476616	1.51236916323683e-07	0.000455811	0.223117	5.32907051820075e-15	1.2196910148532e-12	2.02921066616568e-08	5.79536418854332e-13	NA	0.00438791	0.00203642	0.189615	0.643165	0.201031	0.286029	0.275935	0.359268	0.484564	0.271349	0.793046	0.433135	0.350614	0.469341	0.0246187	0.0103336	0.617028	0.586752	0.225451	0.1448	0.679272	0.897011	0.825672	0.74926	0.738015
gdd_MM3.2	0.392724	0.357219	0.230664	0.418164	0.41551	0.411241	0.388527	0.386216	0.429893	0.461644	0.742314	0.079625	0.921415	0.163619	0.962112	0.936073	0.75218	0.172462	0.615856	0.00434192	0.10646	0.0926085	0.0670011	0.00438791	NA	2.27506902206187e-12	0.549618	0.575341	0.896544	0.991537	0.576409	0.808284	0.408766	0.677047	NA	0.661915	0.998763	0.983476	0.385774	0.899934	0.809299	NA	NA	NA	NA	NA	NA	NA	NA
gdd_MM3	0.427109	0.370409	0.231656	0.500754	0.474656	0.447993	0.387839	0.393488	0.461833	0.518013	0.668931	0.147754	0.962998	0.692401	0.783625	0.814836	0.992452	0.690773	0.619897	0.0298771	0.133497	0.064809	0.0480671	0.00203642	2.27506902206187e-12	NA	0.50302	0.798028	0.891896	0.985106	0.553315	0.812472	0.400528	0.644699	NA	0.615835	0.982433	0.976828	0.423835	0.782991	0.834941	NA	NA	NA	NA	NA	0	NA	NA
gdd_slope	0.690003	0.66885	0.997741	0.877744	0.910434	0.883114	0.409766	0.368785	0.971701	0.847322	0.21475	0.796131	0.788613	0.151853	0.157165	0.152473	0.157485	0.139549	0.349615	0.179261	0.201088	0.180162	0.284585	0.189615	0.549618	0.50302	NA	0.118917	0.579806	0.141744	0.0379272	0.872676	0.777201	9.97717464201742e-11	0.0654767	0.434731	0.123843	0.0384553	0.870056	0.639922	0.191484	0.208932	0.597994	0.764065	0.42071	0.100505	0.850476	0.518619	0.774463
slope_std	0.772467	0.940444	0.660269	0.169037	0.587441	0.752799	0.832253	0.831788	0.650035	0.555775	0.759492	0.867741	0.424867	0.513028	0.25049	0.739351	0.893606	0.467884	0.704807	0.471165	0.800959	0.225821	0.478183	0.643165	0.575341	0.798028	0.118917	NA	0.538617	0.868194	0.898591	0.635284	0.302622	0.0714172	0.0342685	0.6393	0.892431	0.774328	0.0508803	0.830016	0.623318	0.684316	0.291781	0.797301	0.576108	0.405624	0.502968	0.0683342	0.550949
midvein_phloem	0.997071	0.865391	0.302547	0.279462	0.798476	0.813297	0.65757	0.748993	0.846052	0.848023	0.912837	0.0496267	0.00177154	0.373982	0.394596	0.256232	0.294238	0.328817	0.271931	0.181821	0.20461	0.135112	0.247116	0.201031	0.896544	0.891896	0.579806	0.538617	NA	0.715939	0.80744	0.511095	0.435249	0.503404	0.857542	1.71976983764921e-08	0.657835	0.734577	0.969082	0.566027	0.259361	0.932322	0.971848	0.759588	0.52608	0.113789	0.91792	0.943198	0.492527
petiole_phloem	0.786193	0.654807	0.757427	0.616177	0.773827	0.632942	0.79653	0.970365	0.899042	0.768666	0.520244	0.766093	0.788881	0.291091	0.295461	0.216275	0.263036	0.284739	0.0458701	0.276668	0.286591	0.213865	0.315903	0.286029	0.991537	0.985106	0.141744	0.868194	0.715939	NA	0.00807272	0.739963	0.148329	0.168436	0.315608	0.297175	0	0.0751192	0.935167	0.428055	0.0453369	0.282776	0.0897826	0.114021	0.514379	0.492358	0.137883	0.388239	0.610083
pedicel_phloem	0.236769	0.475494	0.990452	0.19017	0.197221	0.257024	0.442002	0.337446	0.37458	0.383399	0.589104	0.561133	0.897566	0.43075	0.345177	0.500799	0.321927	0.393154	0.00674298	0.288933	0.300457	0.333507	0.42408	0.275935	0.576409	0.553315	0.0379272	0.898591	0.80744	0.00807272	NA	0.599798	0.126976	0.0369419	0.66538	0.652518	0.00996119	0.00216664	0.997494	0.333109	0.156301	0.341173	0.444633	0.200756	0.25372	0.846781	0.769734	0.929875	0.549423
porosity	0.230839	0.186545	0.356065	0.512682	0.293513	0.243736	0.22447	0.279789	0.31353	0.343932	0.346739	0.606394	0.642787	0.330963	0.47893	0.312968	0.366665	0.375284	0.62113	0.360262	0.4568	0.244957	0.302438	0.359268	0.808284	0.812472	0.872676	0.635284	0.511095	0.739963	0.599798	NA	0.579683	0.995088	0.644218	0.335899	0.771208	0.711588	0.760301	0.960209	0.1696	0.0372785	0.700417	0.537111	0.225126	0.958368	0.717561	0.284202	0.852922
SE_area	0.0680002	0.0758502	0.472887	0.22835	0.0881009	0.133752	0.0908654	0.0942064	0.114066	0.173384	0.906486	0.558999	0.757515	0.58503	0.854351	0.52577	0.881622	0.627339	0.0434125	0.484834	0.728318	0.31157	0.611695	0.484564	0.408766	0.400528	0.777201	0.302622	0.435249	0.148329	0.126976	0.579683	NA	0.583847	0.954209	0.61668	0.137132	0.7638	0.288923	0.106129	0.511043	0.285324	0.345172	0.313725	0.136301	0.177141	0.177056	0.757417	0.282029
delta_brix	0.45203	0.40829	0.691017	0.951799	0.655946	0.614388	0.237714	0.228418	0.636322	0.821434	0.223773	0.836657	0.913487	0.215678	0.212145	0.219865	0.216221	0.202343	0.4506	0.27002	0.298501	0.258853	0.385156	0.271349	0.677047	0.644699	9.97717464201742e-11	0.0714172	0.503404	0.168436	0.0369419	0.995088	0.583847	NA	0.879491	0.333932	0.1372	0.0499667	0.444751	0.675208	0.0505834	0.76874	0.798446	0.950752	0.668427	0.158857	0.529532	0.655687	0.78832
max_photo	0.90976	0.898373	0.900491	0.769908	0.898554	0.878787	0.95578	0.921459	0.981208	0.937177	0.0104716	0.559231	0.715358	0.936631	0.67695	0.0686514	0.672646	0.857267	0.758268	0.960426	0.796787	0.0730117	0.972648	0.793046	NA	NA	0.0654767	0.0342685	0.857542	0.315608	0.66538	0.644218	0.954209	0.879491	NA	0.738946	0.302233	0.29942	0.0134578	0.945405	0.595834	0.218443	0.191861	0.732903	0.350304	0.164254	0.809009	0.322646	0.648678
midvein_xylem	0.856605	0.752456	0.363961	0.378258	0.925355	0.924502	0.500277	0.545086	0.873886	0.870059	0.754094	0.0155616	0.00105258	0.61618	0.602494	0.401514	0.458522	0.561292	0.627887	0.369523	0.412246	0.277564	0.471735	0.433135	0.661915	0.615835	0.434731	0.6393	1.71976983764921e-08	0.297175	0.652518	0.335899	0.61668	0.333932	0.738946	NA	0.24263	0.505025	0.905096	0.963749	0.144006	0.745649	0.90629	0.827115	0.163979	0.303896	0.795916	0.984576	0.13337
petiole_xylem	0.729621	0.610475	0.728747	0.694916	0.716641	0.583421	0.752563	0.914474	0.836557	0.707982	0.45342	0.78788	0.8331	0.358342	0.365977	0.26573	0.339137	0.352517	0.0536719	0.331805	0.357093	0.250669	0.388704	0.350614	0.998763	0.982433	0.123843	0.892431	0.657835	0	0.00996119	0.771208	0.137132	0.1372	0.302233	0.24263	NA	0.0843858	0.784123	0.489837	0.0276904	0.271412	0.102381	0.141999	0.492008	0.435875	0.119486	0.391603	0.557117
pedicel_xylem	0.846328	0.638652	0.437821	0.744166	0.902207	0.837115	0.68929	0.743895	0.818342	0.786073	0.193209	0.476565	0.818797	0.409524	0.294573	0.29286	0.246827	0.367892	0.141044	0.45478	0.362413	0.337175	0.457479	0.469341	0.983476	0.976828	0.0384553	0.774328	0.734577	0.0751192	0.00216664	0.711588	0.7638	0.0499667	0.29942	0.505025	0.0843858	NA	0.995825	0.757566	0.336364	0.653676	0.193333	0.451176	0.797476	0.0141406	0.442394	0.980963	0.658788
A_gdd_max_ave	0.15369	0.217199	0.137486	0.0386563	0.0856774	0.106015	0.493042	0.459401	0.105106	0.0800147	0.138156	0.338853	0.267424	0.195562	0.363694	0.0578329	0.0331653	0.200879	0.568959	0.0227561	0.0490558	0.015043	0.017678	0.0246187	0.385774	0.423835	0.870056	0.0508803	0.969082	0.935167	0.997494	0.760301	0.288923	0.444751	0.0134578	0.905096	0.784123	0.995825	NA	0.567323	0.00252486	0.153851	0.575707	0.794703	0.119532	0.449704	0.595444	0.320274	0.967669
WP_Max_Brix	0.340652	0.345193	0.525505	0.186212	0.537472	0.60706	0.162234	0.121609	0.437322	0.69444	0.705944	0.666326	0.606169	0.00107126	0.00231645	0.0037724	0.0140548	0.00109064	0.470392	0.02927	0.0211571	0.0215553	0.0224879	0.0103336	0.899934	0.782991	0.639922	0.830016	0.566027	0.428055	0.333109	0.960209	0.106129	0.675208	0.945405	0.963749	0.489837	0.757566	0.567323	NA	0.230086	0.222053	0.281282	0.297886	0.0525712	0.342112	0.994054	0.452757	0.133671
WP_gdd_max	0.992576	0.942069	0.911047	0.98671	0.742006	0.710362	0.57154	0.554449	0.867366	0.63547	0.0574333	0.781758	0.901933	0.905917	0.9466	0.769263	0.483999	0.929238	0.432476	0.597233	0.64762	0.664624	0.460784	0.617028	0.809299	0.834941	0.191484	0.623318	0.259361	0.0453369	0.156301	0.1696	0.511043	0.0505834	0.595834	0.144006	0.0276904	0.336364	0.00252486	0.230086	NA	0.280693	0.0529753	0.0780142	0.283626	0.290917	0.511624	0.439296	0.638694
A_July23	0.196339	0.160178	0.285194	0.28328	0.213403	0.194808	0.197825	0.270156	0.2077	0.189503	0.549777	0.472882	0.691339	0.624801	0.852504	0.780697	0.963698	0.679946	0.462961	0.569269	0.745839	0.412401	0.745091	0.586752	NA	NA	0.208932	0.684316	0.932322	0.282776	0.341173	0.0372785	0.285324	0.76874	0.218443	0.745649	0.271412	0.653676	0.153851	0.222053	0.280693	NA	0.933519	0.712634	0.0353052	0.847253	0.87887	0.705838	0.78288
A_July30	0.19208	0.190633	0.508278	0.423601	0.226717	0.249172	0.138592	0.103181	0.194676	0.233723	0.0948183	0.518372	0.629475	0.439912	0.465528	0.00306523	0.788053	0.439642	0.389264	0.25851	0.321762	0.703653	0.424036	0.225451	NA	NA	0.597994	0.291781	0.971848	0.0897826	0.444633	0.700417	0.345172	0.798446	0.191861	0.90629	0.102381	0.193333	0.575707	0.281282	0.0529753	0.933519	NA	0.0240376	0.878704	0.186603	0.305696	0.799188	0.856987
A_Aug5	0.103364	0.101829	0.496638	0.26649	0.139187	0.157525	0.0593403	0.0506556	0.135122	0.173619	0.48553	0.216937	0.488868	0.287232	0.424969	0.102728	0.815432	0.316358	0.231155	0.0731759	0.197373	0.56919	0.212584	0.1448	NA	NA	0.764065	0.797301	0.759588	0.114021	0.200756	0.537111	0.313725	0.950752	0.732903	0.827115	0.141999	0.451176	0.794703	0.297886	0.0780142	0.712634	0.0240376	NA	0.659897	0.603637	0.077966	0.662364	0.756746
A_Sep3	0.0853804	0.0756367	0.064656	0.141234	0.0733173	0.0670365	0.118855	0.166471	0.0815542	0.0540887	0.699584	0.558893	0.250893	0.866466	0.840922	0.896685	0.628641	0.959053	0.106202	0.809581	0.936498	0.782674	0.870895	0.679272	NA	NA	0.42071	0.576108	0.52608	0.514379	0.25372	0.225126	0.136301	0.668427	0.350304	0.163979	0.492008	0.797476	0.119532	0.0525712	0.283626	0.0353052	0.878704	0.659897	NA	0.640134	0.923022	0.764866	0.30721
psi_min_pd	0.547624	0.535237	0.527953	0.879226	0.532152	0.551444	0.549306	0.514891	0.48312	0.445727	0.193676	0.826283	0.30503	0.562649	0.592683	0.201834	0.450712	0.564925	0.459671	0.628933	0.595371	0.0892829	0.418658	0.897011	NA	NA	0.100505	0.405624	0.113789	0.492358	0.846781	0.958368	0.177141	0.158857	0.164254	0.303896	0.435875	0.0141406	0.449704	0.342112	0.290917	0.847253	0.186603	0.603637	0.640134	NA	0.918835	0.389467	0.272391
psiPD_July23	0.608617	0.584391	0.750791	0.952876	0.689449	0.729619	0.484383	0.512658	0.712481	0.751316	0.755631	0.0129057	0.712934	0.965017	0.83811	0.602912	0.499496	0.991651	0.589654	0.428751	0.756115	0.262539	0.643531	0.825672	NA	0	0.850476	0.502968	0.91792	0.137883	0.769734	0.717561	0.177056	0.529532	0.809009	0.795916	0.119486	0.442394	0.595444	0.994054	0.511624	0.87887	0.305696	0.077966	0.923022	0.918835	NA	0.148759	0.189302
psiPD_Aug5	0.769773	0.738673	0.512238	0.805053	0.756134	0.724833	0.802163	0.767327	0.658944	0.648831	0.192389	0.302083	0.816202	0.798426	0.610778	0.501201	0.513292	0.738752	0.826867	0.821184	0.879708	0.129055	0.908002	0.74926	NA	NA	0.518619	0.0683342	0.943198	0.388239	0.929875	0.284202	0.757417	0.655687	0.322646	0.984576	0.391603	0.980963	0.320274	0.452757	0.439296	0.705838	0.799188	0.662364	0.764866	0.389467	0.148759	NA	0.182002
psiPD_Sept3	0.401551	0.433266	0.0721087	0.296862	0.322601	0.309041	0.534348	0.50509	0.314929	0.266486	0.416409	0.274204	0.282441	0.913688	0.924671	0.739437	0.880551	0.940412	0.40909	0.736396	0.841338	0.161814	0.629997	0.738015	NA	NA	0.774463	0.550949	0.492527	0.610083	0.549423	0.852922	0.282029	0.78832	0.648678	0.13337	0.557117	0.658788	0.967669	0.133671	0.638694	0.78288	0.856987	0.756746	0.30721	0.272391	0.189302	0.182002	NA
psimin_MD	0.761555	0.708364	0.659736	0.721873	0.760052	0.717942	0.804194	0.927429	0.768149	0.715922	0.204359	0.831715	0.569209	0.995107	0.840934	0.209385	0.880877	0.955542	0.905889	0.906934	0.823317	0.424629	0.881668	0.877453	NA	NA	0.211646	0.448429	0.926052	0.0314919	0.782476	0.234367	0.7259	0.679676	0.0752845	0.794572	0.033944	0.293473	0.172477	0.710907	0.948384	0.031344	0.253709	0.540644	0.177761	0.446809	0.663109	0.763248	0.892013
psiMD_July23	0.289463	0.284609	0.299451	0.566017	0.27384	0.29007	0.300573	0.28359	0.249519	0.217845	0.280146	0.673631	0.273229	0.719234	0.655532	0.213342	0.441764	0.69152	0.221892	0.839755	0.715631	0.220636	0.537872	0.903965	NA	NA	0.27941	0.588438	0.127653	0.467244	0.81501	0.819694	0.0764507	0.15371	0.327618	0.190623	0.434765	0.0177113	0.776543	0.163796	0.191248	0.911134	0.147154	0.415777	0.376307	0.00200776	0.762035	0.526233	0.230288
psiMD_July30	0.0251482	0.0203464	0.0174164	0.067565	0.0219831	0.0182428	0.0377634	0.0442396	0.0143727	0.0097193	0.501042	0.918407	0.574778	0.46065	0.600168	0.432681	0.817106	0.50161	0.166786	0.527441	0.598336	0.734044	0.7643	0.279577	NA	NA	0.718631	0.592663	0.790653	0.702919	0.181343	0.0526231	0.0657712	0.99076	0.971145	0.40232	0.651319	0.705931	0.60929	0.00254569	0.0521788	0.11695	0.397651	0.460252	0.039733	0.348029	0.840979	0.24889	0.138849
psi_MD_Aug5	0.0518246	0.0666151	0.136494	0.0482475	0.0564051	0.0610648	0.0484768	0.0258039	0.0515	0.0781785	0.162464	0.950111	0.419562	0.0497717	0.0844293	0.0653959	0.239604	0.0588288	0.0496369	0.0480931	0.0554138	0.985029	0.109542	0.00752313	NA	NA	0.67865	0.361835	0.476079	0.338273	0.0438242	0.63014	0.650051	0.565276	0.497342	0.936349	0.450104	0.785695	0.987543	0.106536	0.110433	0.817172	0.0654033	0.0724804	0.653564	0.624741	0.709151	0.754041	0.53396
psi_MD_Aug10	0.534507	0.61783	0.161463	0.299121	0.428407	0.431229	0.698008	0.658151	0.486417	0.43531	0.814165	0.381575	0.386829	0.943573	0.944426	0.973635	0.971178	0.989167	0.280616	0.842677	0.817041	0.519374	0.707269	0.799852	NA	NA	0.940068	0.807697	0.567499	0.911811	0.414446	0.362478	0.934566	0.628434	0.970761	0.0802724	0.992078	0.69003	0.655842	0.346009	0.84758	0.781652	0.99724	0.885818	0.51439	0.600633	0.498537	0.982789	0.076439
[truncated: 5 more columns]
